# Supplementary material for: RAN-Binding Protein 9 is Involved in Alternative Splicing and is Critical for Male Germ Cell Development and Male Fertility
Source: PubMed Central journal article supplement (PMC4256260; doi:10.1371/journal.pgen.1004825), 2014-12-04

Figure S5

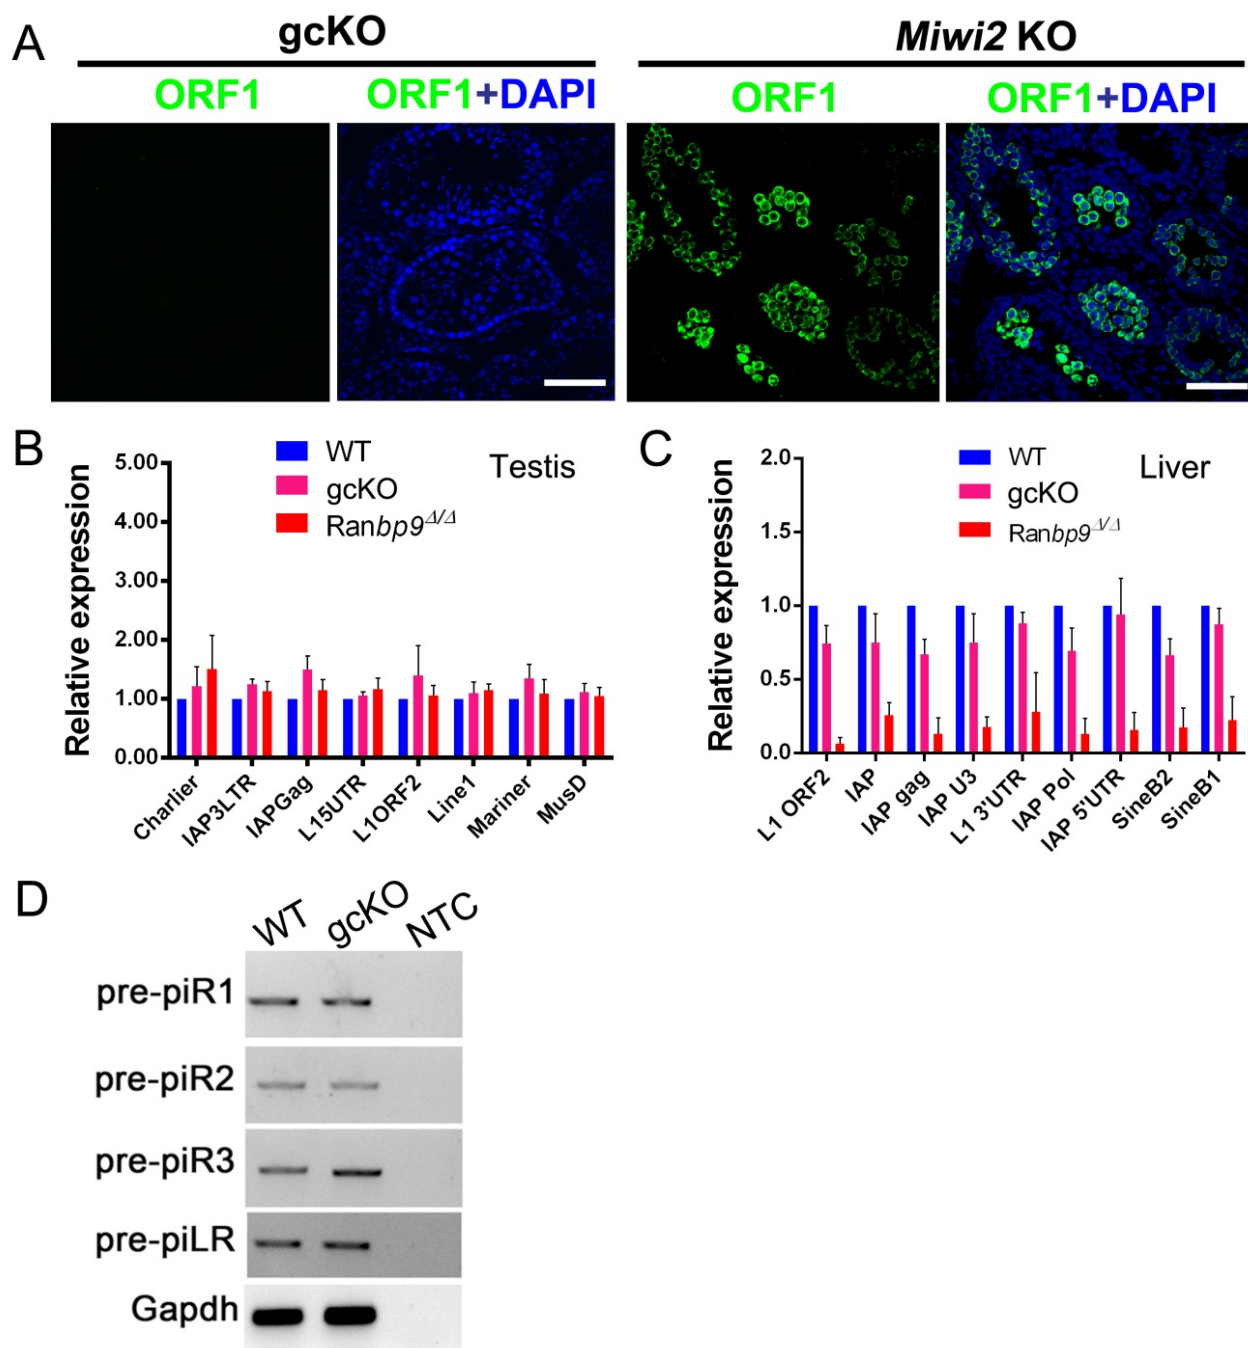

Supplement: pgen.1004825.s005.pdf [file pgen.1004825.s005.pdf]
